# Supplementary material for: Gfi1Cre mice have early onset progressive hearing loss and induce recombination in numerous inner ear non-hair cells
Source: PubMed Central journal article supplement (PMC5299610; doi:10.1038/srep42079), 2017-02-09
Supplement: srep42079-s1.pdf [file srep42079-s1.pdf]

Supplementary figures and tables for:

***Gfi1-Cre* mice have early onset progressive hearing loss and induce recombination in numerous inner ear non-hair cells**

Maggie Matern<sup>1</sup>, Sarath Vijayakumar<sup>2</sup>, Zachary Margulies<sup>1</sup>, Beatrice Milon<sup>1</sup>, Yang Song<sup>3</sup>, Ran Elkon<sup>4</sup>, Xiaoyu Zhang<sup>1</sup>, Sherri M. Jones<sup>2</sup>, and Ronna Hertzano\*<sup>1,3,5</sup>

**Supplementary Figure 1** One representative FACS analysis of cochlear single cell suspensions from four day old *Gfi1<sup>Cre/+</sup>; ROSA26<sup>CAG-tdTomato</sup>* mice, analyzing expression of CD326 and CD45 in the tdTomato positive cell population. On average, 95.2% of CD45 positive cells were also positive for tdTomato (P1, immune cells).

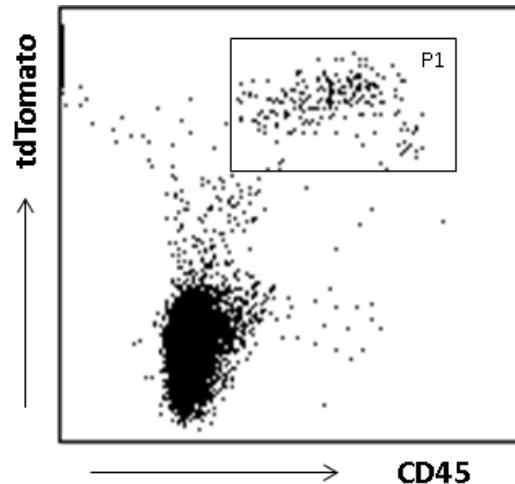

**Supplementary Figure 2 Quantitative comparative analysis of *Gfi1* transcript in *Gfi1<sup>+/+</sup>* and *Gfi1<sup>Cre/+</sup>* cochlea.** RT-qPCR data showing relative expression levels of shared and unique exons between the wild-type and *Gfi1<sup>Cre</sup>* knock-in alleles in the cochlea of newborn *Gfi1<sup>+/+</sup>* and *Gfi1<sup>Cre/+</sup>* littermates. A statistically significant ~30-40% decrease of *Gfi1* expression within regions substituted by Cre recombinase can be observed in *Gfi1<sup>Cre/+</sup>* mice cochlea compared to wild-type: exons 2 to 3 (Ex2-3: fold change = 0.675, *p*-value = 0.022), and exons 5 to 6 (Ex5-6: fold change = 0.621, *p*-value = 0.005). No significant change in abundance was observed for a region shared between the two genotypes (Ex6-7: fold change = 1.099, *p*-value = 0.52). N=4. Error bars represent fold change values taking into account one standard deviation. Statistical significance was assessed using Welch's t-test.

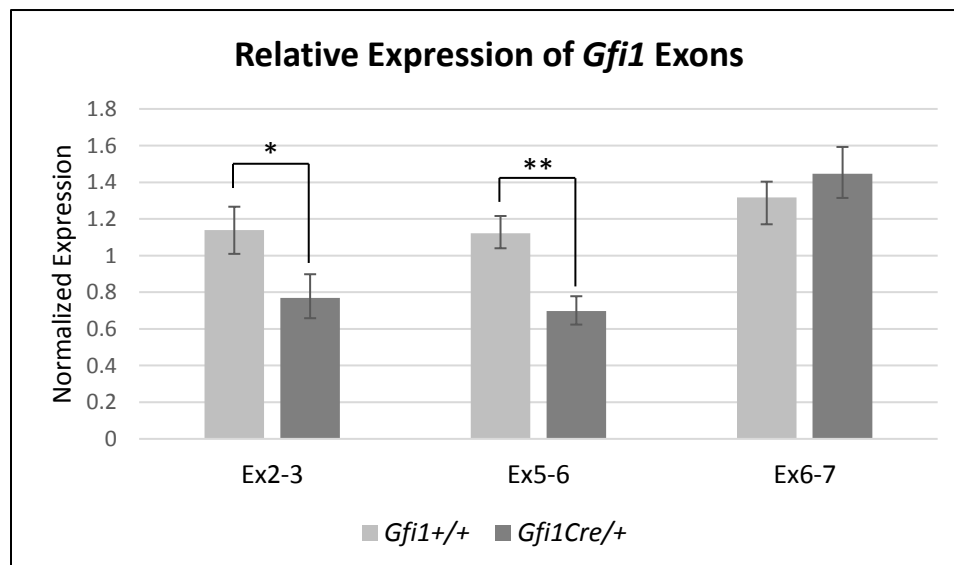

**Supplementary Table 1** List of genes encoding 521 transcripts enriched in HCs according to both Elkon et al. and Cai et al.<sup>1,32</sup>

| Ensembl ID         | Gene symbol   |
|--------------------|---------------|
| ENSMUSG00000037971 | 1110032A03Rik |
| ENSMUSG00000046999 | 1110032F04Rik |
| ENSMUSG00000031847 | 1700030J22Rik |
| ENSMUSG00000062760 | 1810041L15Rik |
| ENSMUSG00000026090 | 2010300C02Rik |
| ENSMUSG00000071632 | 2510002D24Rik |
| ENSMUSG00000028300 | 3110043O21Rik |
| ENSMUSG00000046567 | 4930430F08Rik |
| ENSMUSG00000050549 | 5730508B09Rik |
| ENSMUSG00000079499 | 6530402F18Rik |
| ENSMUSG00000045838 | A430105I19Rik |
| ENSMUSG00000023088 | Abcc1         |
| ENSMUSG00000055782 | Abcd2         |
| ENSMUSG00000026644 | Abcd7         |
| ENSMUSG00000028937 | Acot7         |
| ENSMUSG00000031278 | Acsl4         |
| ENSMUSG00000027605 | Acss2         |
| ENSMUSG00000056367 | Actr3b        |
| ENSMUSG00000020926 | Adam11        |
| ENSMUSG00000022376 | Adcy8         |
| ENSMUSG00000031785 | Adgrg1        |
| ENSMUSG00000069170 | Adgrv1        |
| ENSMUSG00000046312 | AI464131      |
| ENSMUSG00000040407 | Akap9         |
| ENSMUSG00000005686 | Ampd3         |
| ENSMUSG00000024774 | Ankrd22       |
| ENSMUSG00000054708 | Ankrd24       |
| ENSMUSG00000058589 | Anks1b        |
| ENSMUSG00000074968 | Ano3          |
| ENSMUSG00000029994 | Anxa4         |
| ENSMUSG00000062444 | Ap3b2         |
| ENSMUSG00000024897 | Apba1         |
| ENSMUSG00000006651 | Aplp1         |
| ENSMUSG00000021662 | Arhgef28      |
| ENSMUSG00000023017 | Asic1         |
| ENSMUSG00000026663 | Atf6          |

|                    |          |
|--------------------|----------|
| ENSMUSG00000031441 | Atp11a   |
| ENSMUSG00000031376 | Atp2b3   |
| ENSMUSG00000019302 | Atp6v0a1 |
| ENSMUSG00000021983 | Atp8a2   |
| ENSMUSG00000018126 | Baiap2l2 |
| ENSMUSG00000026805 | Barhl1   |
| ENSMUSG00000006464 | Bbs1     |
| ENSMUSG00000063145 | Bbs5     |
| ENSMUSG00000034773 | BC030867 |
| ENSMUSG00000000861 | Bcl11a   |
| ENSMUSG00000048482 | Bdnf     |
| ENSMUSG00000092060 | Bend4    |
| ENSMUSG00000027358 | Bmp2     |
| ENSMUSG00000035390 | Brsk1    |
| ENSMUSG00000053046 | Brsk2    |
| ENSMUSG00000032589 | Bsn      |
| ENSMUSG00000040565 | Btaf1    |
| ENSMUSG00000020042 | Btbd11   |
| ENSMUSG00000000202 | Btbd17   |
| ENSMUSG00000032120 | C2cd2l   |
| ENSMUSG00000050390 | C77080   |
| ENSMUSG00000057914 | Cacnb2   |
| ENSMUSG00000019146 | Cacng2   |
| ENSMUSG00000028222 | Calb1    |
| ENSMUSG00000003657 | Calb2    |
| ENSMUSG00000030669 | Calca    |
| ENSMUSG00000001175 | Calm1    |
| ENSMUSG00000033170 | Card10   |
| ENSMUSG00000010755 | Cars     |
| ENSMUSG00000028977 | Casz1    |
| ENSMUSG00000026578 | Ccdc181  |
| ENSMUSG00000027676 | Ccdc39   |
| ENSMUSG00000039963 | Ccdc40   |
| ENSMUSG00000003354 | Ccdc65   |
| ENSMUSG00000038903 | Ccdc68   |
| ENSMUSG00000021182 | Ccdc88c  |
| ENSMUSG00000050677 | Ccdc96   |
| ENSMUSG00000033904 | Ccp110   |
| ENSMUSG00000058690 | Ccser2   |

|                    |          |
|--------------------|----------|
| ENSMUSG00000028865 | Cd164l2  |
| ENSMUSG00000026490 | Cdc42bpa |
| ENSMUSG00000024304 | Cdh2     |
| ENSMUSG00000012819 | Cdh23    |
| ENSMUSG00000026023 | Cdk15    |
| ENSMUSG00000020015 | Cdk17    |
| ENSMUSG00000039298 | Cdk5rap2 |
| ENSMUSG00000020990 | Cdk11    |
| ENSMUSG00000033966 | Cdk14    |
| ENSMUSG00000031758 | Cdy12    |
| ENSMUSG00000023473 | Celsr3   |
| ENSMUSG00000035790 | Cep19    |
| ENSMUSG00000035891 | Cerk     |
| ENSMUSG00000031347 | Cetn2    |
| ENSMUSG00000028294 | Cfap206  |
| ENSMUSG00000040473 | Cfap69   |
| ENSMUSG00000041235 | Chd7     |
| ENSMUSG00000021194 | Chga     |
| ENSMUSG00000027350 | Chgb     |
| ENSMUSG00000027107 | Chrna1   |
| ENSMUSG00000066279 | Chrna10  |
| ENSMUSG00000029205 | Chrna9   |
| ENSMUSG00000027950 | Chrb2    |
| ENSMUSG00000035200 | Chrb4    |
| ENSMUSG00000037493 | Cib2     |
| ENSMUSG00000000308 | Ckmt1    |
| ENSMUSG00000047109 | Cldn14   |
| ENSMUSG00000033633 | Clec18a  |
| ENSMUSG00000032245 | Cln6     |
| ENSMUSG00000047547 | Cltb     |
| ENSMUSG00000025658 | Cnksr2   |
| ENSMUSG00000018661 | Cog1     |
| ENSMUSG00000026798 | Coq4     |
| ENSMUSG00000037852 | Cpe      |
| ENSMUSG00000025586 | Cpeb1    |
| ENSMUSG00000039652 | Cpeb3    |
| ENSMUSG00000033615 | Cplx1    |
| ENSMUSG00000029121 | Crmp1    |
| ENSMUSG00000022240 | Ctnnd2   |

|                    |               |
|--------------------|---------------|
| ENSMUSG00000026726 | Cubn          |
| ENSMUSG00000021508 | Cxcl14        |
| ENSMUSG00000019590 | Cyb561        |
| ENSMUSG00000026456 | Cyb5r1        |
| ENSMUSG00000031865 | Dctn1         |
| ENSMUSG00000027173 | Depdc7        |
| ENSMUSG00000075267 | Dfnb59        |
| ENSMUSG00000034731 | Dgkh          |
| ENSMUSG00000040035 | Disp2         |
| ENSMUSG00000052572 | Dlg2          |
| ENSMUSG00000047428 | Dlk2          |
| ENSMUSG00000014773 | Dll1          |
| ENSMUSG00000027314 | Dll4          |
| ENSMUSG00000041268 | Dmxl2         |
| ENSMUSG00000020973 | Dnaaf2        |
| ENSMUSG00000018581 | Dnah11        |
| ENSMUSG00000033826 | Dnah8         |
| ENSMUSG00000034706 | Dnaic2        |
| ENSMUSG00000030708 | Dnajb13       |
| ENSMUSG00000036766 | Dner          |
| ENSMUSG00000040265 | Dnm3          |
| ENSMUSG00000039716 | Dock3         |
| ENSMUSG00000057147 | Dph6          |
| ENSMUSG00000029005 | Draxin        |
| ENSMUSG00000032087 | Dscaml1       |
| ENSMUSG00000024302 | Dtna          |
| ENSMUSG00000018648 | Dusp14        |
| ENSMUSG00000047193 | Dync2h1       |
| ENSMUSG00000034467 | Dynlrb2       |
| ENSMUSG00000069085 | Dytn          |
| ENSMUSG00000037259 | Dzank1        |
| ENSMUSG00000045071 | E130308A19Rik |
| ENSMUSG00000041809 | Efhc1         |
| ENSMUSG00000015002 | Efr3a         |
| ENSMUSG00000048988 | Elfn1         |
| ENSMUSG00000043460 | Elfn2         |
| ENSMUSG00000041986 | Elmod1        |
| ENSMUSG00000022012 | Enox1         |
| ENSMUSG00000025504 | Eps8l2        |

|                    |         |
|--------------------|---------|
| ENSMUSG00000054051 | Ercc6   |
| ENSMUSG00000028943 | Espn    |
| ENSMUSG00000049515 | Espnl   |
| ENSMUSG00000026610 | Esrrg   |
| ENSMUSG00000053799 | Exoc6   |
| ENSMUSG00000029461 | Fam168a |
| ENSMUSG00000055865 | Fam19a3 |
| ENSMUSG00000048458 | Fam212b |
| ENSMUSG00000070476 | Fam217b |
| ENSMUSG00000058966 | Fam57b  |
| ENSMUSG00000060568 | Fam78b  |
| ENSMUSG00000025738 | Fbxl16  |
| ENSMUSG00000034532 | Fbxo16  |
| ENSMUSG00000073633 | Fbxo36  |
| ENSMUSG00000001366 | Fbxo9   |
| ENSMUSG00000070524 | Fcrlb   |
| ENSMUSG00000032118 | Fez1    |
| ENSMUSG00000060579 | Fhit    |
| ENSMUSG00000034295 | Fhod3   |
| ENSMUSG00000025175 | Fn3k    |
| ENSMUSG00000038368 | Focad   |
| ENSMUSG00000034227 | Foxj1   |
| ENSMUSG00000070733 | Fryl    |
| ENSMUSG00000054752 | Fsd11   |
| ENSMUSG00000036264 | Fstl4   |
| ENSMUSG00000026787 | Gad2    |
| ENSMUSG00000060988 | Galnt13 |
| ENSMUSG00000024064 | Galnt14 |
| ENSMUSG00000031451 | Gas6    |
| ENSMUSG00000021360 | Gcnt2   |
| ENSMUSG00000025777 | Gdap1   |
| ENSMUSG00000029275 | Gfi1    |
| ENSMUSG00000031748 | Gnao1   |
| ENSMUSG00000034707 | Gns     |
| ENSMUSG00000041762 | Gpr155  |
| ENSMUSG00000046961 | Gpr156  |
| ENSMUSG00000044317 | Gpr4    |
| ENSMUSG00000010825 | Grid2ip |
| ENSMUSG00000031450 | Grk1    |

|                    |           |
|--------------------|-----------|
| ENSMUSG00000024517 | Grp       |
| ENSMUSG00000024580 | Grpel2    |
| ENSMUSG00000038515 | Grtp1     |
| ENSMUSG00000068082 | Grxcr1    |
| ENSMUSG00000073574 | Grxcr2    |
| ENSMUSG00000004035 | Gstm7     |
| ENSMUSG00000042535 | Gtpbp1    |
| ENSMUSG00000033629 | Hacd3     |
| ENSMUSG00000019853 | Hebp2     |
| ENSMUSG00000021301 | Hecw1     |
| ENSMUSG00000075254 | Heg1      |
| ENSMUSG00000067071 | Hes6      |
| ENSMUSG00000018102 | Hist1h2bc |
| ENSMUSG00000028572 | Hook1     |
| ENSMUSG00000046607 | Hrk       |
| ENSMUSG00000070407 | Hs3st3b1  |
| ENSMUSG00000026675 | Hsd17b7   |
| ENSMUSG00000021270 | Hsp90aa1  |
| ENSMUSG00000025757 | Hspa4l    |
| ENSMUSG00000059854 | Hydin     |
| ENSMUSG00000062995 | Ical      |
| ENSMUSG00000026018 | Ical1     |
| ENSMUSG00000024169 | Ift140    |
| ENSMUSG00000038564 | Ift172    |
| ENSMUSG00000024474 | Ik        |
| ENSMUSG00000034336 | Ina       |
| ENSMUSG00000041324 | Inhba     |
| ENSMUSG00000048782 | Insc      |
| ENSMUSG00000060798 | Intu      |
| ENSMUSG00000035578 | Iqcg      |
| ENSMUSG00000042644 | Itpr3     |
| ENSMUSG00000002799 | Jag2      |
| ENSMUSG00000042861 | Kcna10    |
| ENSMUSG00000042604 | Kcna4     |
| ENSMUSG00000050556 | Kcnb1     |
| ENSMUSG00000038319 | Kcnh2     |
| ENSMUSG00000001901 | Kcnh6     |
| ENSMUSG00000059742 | Kcnh7     |
| ENSMUSG00000035580 | Kcnh8     |



|                    |          |
|--------------------|----------|
| ENSMUSG00000054477 | Kenn2    |
| ENSMUSG00000028631 | Kcnq4    |
| ENSMUSG00000024201 | Kdm4b    |
| ENSMUSG00000010021 | Kif19a   |
| ENSMUSG00000041642 | Kif21b   |
| ENSMUSG00000028438 | Kif24    |
| ENSMUSG00000074657 | Kif5a    |
| ENSMUSG00000026764 | Kif5c    |
| ENSMUSG00000032489 | Kif9     |
| ENSMUSG00000091680 | Klhdc7b  |
| ENSMUSG00000073774 | Kncn     |
| ENSMUSG00000066129 | Kndc1    |
| ENSMUSG00000035849 | Krt222   |
| ENSMUSG00000032370 | Lactb    |
| ENSMUSG00000028581 | Laptm5   |
| ENSMUSG00000060594 | Layn     |
| ENSMUSG00000042873 | Lhfp14   |
| ENSMUSG00000062252 | Lhfp15   |
| ENSMUSG00000026934 | Lhx3     |
| ENSMUSG00000023022 | Lima1    |
| ENSMUSG00000044626 | Liph     |
| ENSMUSG00000039704 | Lmbrd2   |
| ENSMUSG00000033060 | Lmo7     |
| ENSMUSG00000048096 | Lmod1    |
| ENSMUSG00000044086 | Lmod3    |
| ENSMUSG00000016520 | Ln timer |
| ENSMUSG00000032818 | Loxhd1   |
| ENSMUSG00000056215 | Lrguk    |
| ENSMUSG00000019796 | Lrp11    |
| ENSMUSG00000028613 | Lrp8     |
| ENSMUSG00000015980 | Lrrc27   |
| ENSMUSG00000056598 | Lrrc48   |
| ENSMUSG00000071073 | Lrrc73   |
| ENSMUSG00000055003 | Lrtm2    |
| ENSMUSG00000022577 | Ly6h     |
| ENSMUSG00000033900 | Map9     |
| ENSMUSG00000022619 | Mapk8ip2 |
| ENSMUSG00000051098 | Mblac2   |
| ENSMUSG00000028910 | Mecr     |

|                    |         |
|--------------------|---------|
| ENSMUSG00000036466 | Megf11  |
| ENSMUSG00000018169 | Mfng    |
| ENSMUSG00000041945 | Mfsd9   |
| ENSMUSG00000043857 | Mgat5b  |
| ENSMUSG00000039478 | Micu3   |
| ENSMUSG00000068011 | Mkrn2os |
| ENSMUSG00000068036 | Mllt4   |
| ENSMUSG00000027612 | Mmp24   |
| ENSMUSG00000032221 | Mns1    |
| ENSMUSG00000039395 | Mreg    |
| ENSMUSG00000051236 | Msrb3   |
| ENSMUSG00000005667 | Mthfd2  |
| ENSMUSG00000045934 | Mtmr11  |
| ENSMUSG00000039431 | Mtmr7   |
| ENSMUSG00000039110 | Mycbpap |
| ENSMUSG00000028654 | Mycl    |
| ENSMUSG00000039057 | Myo16   |
| ENSMUSG00000000631 | Myo18a  |
| ENSMUSG00000066952 | Myo1h   |
| ENSMUSG00000025716 | Myo3a   |
| ENSMUSG00000042064 | Myo3b   |
| ENSMUSG00000033577 | Myo6    |
| ENSMUSG00000030761 | Myo7a   |
| ENSMUSG00000024471 | Myot    |
| ENSMUSG00000047490 | na      |
| ENSMUSG00000027438 | Napb    |
| ENSMUSG00000020576 | Nbas    |
| ENSMUSG00000050323 | Ndufaf6 |
| ENSMUSG00000032012 | Nectin1 |
| ENSMUSG00000022055 | Nefl    |
| ENSMUSG00000022054 | Nefm    |
| ENSMUSG00000035032 | Nek11   |
| ENSMUSG00000034413 | Neur11b |
| ENSMUSG00000026442 | Nfasc   |
| ENSMUSG00000051251 | Nhlh1   |
| ENSMUSG00000021068 | Nin     |
| ENSMUSG00000035984 | Nme5    |
| ENSMUSG00000032456 | Nmnat3  |
| ENSMUSG00000020598 | Nrcam   |

|                    |         |
|--------------------|---------|
| ENSMUSG00000048978 | Nrsn1   |
| ENSMUSG00000066392 | Nrxn3   |
| ENSMUSG00000035513 | Ntng2   |
| ENSMUSG00000030091 | Nup210  |
| ENSMUSG00000048148 | Nwd1    |
| ENSMUSG00000061462 | Obscn   |
| ENSMUSG00000027848 | Olfml3  |
| ENSMUSG00000039747 | Orai2   |
| ENSMUSG00000038150 | Ormdl3  |
| ENSMUSG00000029822 | Osbp13  |
| ENSMUSG00000042616 | Oscp1   |
| ENSMUSG00000062372 | Otof    |
| ENSMUSG00000041161 | Otud3   |
| ENSMUSG00000036990 | Otud4   |
| ENSMUSG00000027071 | P2rx3   |
| ENSMUSG00000037196 | Pacrg   |
| ENSMUSG00000040276 | Pacsin1 |
| ENSMUSG00000031284 | Pak3    |
| ENSMUSG00000064225 | Paqr9   |
| ENSMUSG00000026496 | Parp1   |
| ENSMUSG00000001120 | Pcbp3   |
| ENSMUSG00000025050 | Pcgf6   |
| ENSMUSG00000061601 | Pclo    |
| ENSMUSG00000031592 | Pcm1    |
| ENSMUSG00000034501 | Pcnx4   |
| ENSMUSG00000038370 | Pcp4l1  |
| ENSMUSG00000041837 | Pdcd7   |
| ENSMUSG00000074818 | Pdzd7   |
| ENSMUSG00000035357 | Pdzrn3  |
| ENSMUSG00000021196 | Pfkip   |
| ENSMUSG00000020475 | Pgam2   |
| ENSMUSG00000039987 | Phtf2   |
| ENSMUSG00000041482 | Piezo2  |
| ENSMUSG00000026737 | Pip4k2a |
| ENSMUSG00000017781 | Pitpna  |
| ENSMUSG00000038725 | Pkhd111 |
| ENSMUSG00000026785 | Pkn3    |
| ENSMUSG00000060675 | Pla2g16 |
| ENSMUSG00000024998 | Plce1   |

|                    |           |
|--------------------|-----------|
| ENSMUSG00000029055 | Plch2     |
| ENSMUSG00000051344 | Plekhn3   |
| ENSMUSG00000046204 | Pnma2     |
| ENSMUSG00000031536 | Polb      |
| ENSMUSG00000024497 | Pou4f3    |
| ENSMUSG00000033871 | Ppargc1b  |
| ENSMUSG00000078451 | Ppil6     |
| ENSMUSG00000046442 | Ppm1e     |
| ENSMUSG00000034613 | Ppm1h     |
| ENSMUSG00000028518 | Prkaa2    |
| ENSMUSG00000021948 | Prkcd     |
| ENSMUSG00000035725 | Prkx      |
| ENSMUSG00000039449 | Prpf18    |
| ENSMUSG00000023978 | Prph2     |
| ENSMUSG00000047040 | Prr15l    |
| ENSMUSG00000045009 | Prrt3     |
| ENSMUSG00000024640 | Psat1     |
| ENSMUSG00000043017 | Ptgir     |
| ENSMUSG00000038764 | Ptpn3     |
| ENSMUSG00000056553 | Ptpn2     |
| ENSMUSG00000035916 | Ptprq     |
| ENSMUSG00000005716 | Pvalb     |
| ENSMUSG00000031488 | Rab11fip1 |
| ENSMUSG00000020175 | Rab36     |
| ENSMUSG00000003411 | Rab3b     |
| ENSMUSG00000064181 | Rab3ip    |
| ENSMUSG00000032549 | Rab6b     |
| ENSMUSG00000061311 | Rag1      |
| ENSMUSG00000034472 | Rasd2     |
| ENSMUSG00000035275 | Raver2    |
| ENSMUSG00000038132 | Rbm24     |
| ENSMUSG00000021123 | Rdh12     |
| ENSMUSG00000052852 | Reep1     |
| ENSMUSG00000005873 | Reep5     |
| ENSMUSG00000024186 | Rgs11     |
| ENSMUSG00000029101 | Rgs12     |
| ENSMUSG00000048330 | Ric3      |
| ENSMUSG00000029420 | Rimbp2    |
| ENSMUSG00000037386 | Rims2     |

|                    |          |
|--------------------|----------|
| ENSMUSG00000032890 | Rims3    |
| ENSMUSG00000031438 | Rnf128   |
| ENSMUSG00000047747 | Rnf150   |
| ENSMUSG00000052949 | Rnf157   |
| ENSMUSG00000044164 | Rnf182   |
| ENSMUSG00000029130 | Rnf32    |
| ENSMUSG00000029608 | Rph3a    |
| ENSMUSG00000075334 | Rprm     |
| ENSMUSG00000024033 | Rsph1    |
| ENSMUSG00000029291 | Rufy3    |
| ENSMUSG00000006575 | Rundc3a  |
| ENSMUSG00000021313 | Ryr2     |
| ENSMUSG00000042312 | S100a13  |
| ENSMUSG00000038570 | Saxo2    |
| ENSMUSG00000038936 | Sccpdh   |
| ENSMUSG00000023236 | Scg5     |
| ENSMUSG00000075702 | Selm     |
| ENSMUSG00000063531 | Sema3e   |
| ENSMUSG00000052133 | Sema5b   |
| ENSMUSG00000026315 | Serpina8 |
| ENSMUSG00000032908 | Sgpp2    |
| ENSMUSG00000037833 | Sh2d4b   |
| ENSMUSG00000037541 | Shank2   |
| ENSMUSG00000035378 | Shq1     |
| ENSMUSG00000045180 | Shroom2  |
| ENSMUSG00000017740 | Slc12a5  |
| ENSMUSG00000019935 | Slc17a8  |
| ENSMUSG00000036330 | Slc18a1  |
| ENSMUSG00000029015 | Slc26a5  |
| ENSMUSG00000072572 | Slc39a2  |
| ENSMUSG00000027075 | Slc43a1  |
| ENSMUSG00000030307 | Slc6a11  |
| ENSMUSG00000027894 | Slc6a17  |
| ENSMUSG00000069072 | Slc7a14  |
| ENSMUSG00000030376 | Slc8a2   |
| ENSMUSG00000026062 | Slc9a2   |
| ENSMUSG00000031129 | Slc9a9   |
| ENSMUSG00000041476 | Smpx     |
| ENSMUSG00000027273 | Snap25   |

|                    |          |
|--------------------|----------|
| ENSMUSG00000023064 | Sncg     |
| ENSMUSG00000027457 | Snph     |
| ENSMUSG00000025006 | Sorbs1   |
| ENSMUSG00000001948 | Spa17    |
| ENSMUSG00000072663 | Spef2    |
| ENSMUSG00000041974 | Spidr    |
| ENSMUSG00000024533 | Spire1   |
| ENSMUSG00000058297 | Spock2   |
| ENSMUSG00000021061 | Sptb     |
| ENSMUSG00000021594 | Srd5a1   |
| ENSMUSG00000063919 | Srrm4    |
| ENSMUSG00000025789 | St8sia2  |
| ENSMUSG00000056812 | St8sia3  |
| ENSMUSG00000030688 | Stard10  |
| ENSMUSG00000020303 | Stc2     |
| ENSMUSG00000033498 | Strc     |
| ENSMUSG00000018865 | Sult4a1  |
| ENSMUSG00000038486 | Sv2a     |
| ENSMUSG00000059602 | Syn3     |
| ENSMUSG00000019737 | Syne4    |
| ENSMUSG00000034940 | Synrg    |
| ENSMUSG00000031144 | Syp      |
| ENSMUSG00000027220 | Syt13    |
| ENSMUSG00000016200 | Syt14    |
| ENSMUSG00000026452 | Syt2     |
| ENSMUSG00000024261 | Syt4     |
| ENSMUSG00000051397 | Tacstd2  |
| ENSMUSG00000052302 | Tbc1d30  |
| ENSMUSG00000091002 | Tcerg11  |
| ENSMUSG00000020799 | Tekt1    |
| ENSMUSG00000029359 | Tesc     |
| ENSMUSG00000042581 | Thsd7b   |
| ENSMUSG00000012296 | Tjap1    |
| ENSMUSG00000024749 | Tmc1     |
| ENSMUSG00000042066 | Tmcc2    |
| ENSMUSG00000054434 | Tmem120b |
| ENSMUSG00000024349 | Tmem173  |
| ENSMUSG00000057716 | Tmem178b |
| ENSMUSG00000054013 | Tmem179  |

|                    |          |
|--------------------|----------|
| ENSMUSG00000036687 | Tmem184a |
| ENSMUSG00000026627 | Tmem206  |
| ENSMUSG00000024667 | Tmem216  |
| ENSMUSG00000048022 | Tmem229a |
| ENSMUSG00000031951 | Tmem231  |
| ENSMUSG00000022856 | Tmem41a  |
| ENSMUSG00000030059 | Tmf1     |
| ENSMUSG00000049555 | Tmie     |
| ENSMUSG00000033177 | Tmprss7  |
| ENSMUSG00000028364 | Tnc      |
| ENSMUSG00000018322 | Tomm34   |
| ENSMUSG00000033949 | Trim36   |
| ENSMUSG00000041000 | Trim62   |
| ENSMUSG00000033088 | Triobp   |
| ENSMUSG00000056596 | Trnp1    |
| ENSMUSG00000028251 | Tstd3    |
| ENSMUSG00000032514 | Ttc21a   |
| ENSMUSG00000051036 | Ttc24    |
| ENSMUSG00000038172 | Ttc39b   |
| ENSMUSG00000030276 | Ttl3     |
| ENSMUSG00000036745 | Ttl7     |
| ENSMUSG00000005968 | Tuft1    |
| ENSMUSG00000010054 | Tusc2    |
| ENSMUSG00000023277 | Twf2     |
| ENSMUSG00000034485 | Uaca     |
| ENSMUSG00000036352 | Ubac1    |
| ENSMUSG00000052981 | Ube2q11  |
| ENSMUSG00000043621 | Ubxn10   |
| ENSMUSG00000032854 | Ugt8a    |
| ENSMUSG00000034799 | Unc13a   |
| ENSMUSG00000021198 | Unc79    |
| ENSMUSG00000055567 | Unc80    |
| ENSMUSG00000043241 | Upf2     |
| ENSMUSG00000026609 | Ush2a    |
| ENSMUSG00000026854 | Usp20    |
| ENSMUSG00000054814 | Usp46    |
| ENSMUSG00000047712 | Ust      |
| ENSMUSG00000035284 | Vps13c   |
| ENSMUSG00000046613 | Vwa5b2   |

|                    |         |
|--------------------|---------|
| ENSMUSG00000050830 | Vwc2    |
| ENSMUSG00000019831 | Wasf1   |
| ENSMUSG00000028391 | Wdr31   |
| ENSMUSG00000035126 | Wdr78   |
| ENSMUSG00000029029 | Wrap73  |
| ENSMUSG00000018849 | Wwc1    |
| ENSMUSG00000030657 | Xylt1   |
| ENSMUSG00000060862 | Zbtb40  |
| ENSMUSG00000030471 | Zdhhc13 |
| ENSMUSG00000025157 | Zdhhc16 |
| ENSMUSG00000001065 | Zfp276  |
| ENSMUSG00000037855 | Zfp365  |
| ENSMUSG00000000552 | Zfp385a |
| ENSMUSG00000039081 | Zfp503  |
| ENSMUSG00000054893 | Zfp667  |
| ENSMUSG00000039238 | Zfp750  |
| ENSMUSG00000037492 | Zmat4   |

**Supplementary Table 2** Summary data for *Gfil*<sup>Cre/+</sup> (HET1-3) and *Gfil*<sup>+/+</sup> (WT1-3) RNA-seq samples.

| Sample ID | Total reads | Total mapped reads | % mapped reads | % properly paired | Uniquely mapped reads | % exonic | % intronic | % intergenic | Total features | Features with coverage | Average RPKM |
|-----------|-------------|--------------------|----------------|-------------------|-----------------------|----------|------------|--------------|----------------|------------------------|--------------|
| HET1      | 49458954    | 44653988           | 90.28          | 95.36             | 42632568              | 93.02    | 4.54       | 2.44         | 43620          | 25366                  | 6.365        |
| HET2      | 47591802    | 43262912           | 90.9           | 93.54             | 41438699              | 93.07    | 4.55       | 2.38         | 43620          | 25218                  | 6.042        |
| HET3      | 45775884    | 41202266           | 90.01          | 95.29             | 39367365              | 93.45    | 4.12       | 2.43         | 43620          | 25126                  | 6.312        |
| WT1       | 38491984    | 33187310           | 86.22          | 94.52             | 31444234              | 91.33    | 4.79       | 3.88         | 43620          | 25675                  | 8.193        |
| WT2       | 40764300    | 36770716           | 90.2           | 95.61             | 35038788              | 93.08    | 4.46       | 2.46         | 43620          | 24908                  | 6.736        |
| WT3       | 42862376    | 38067548           | 88.81          | 95.33             | 36389984              | 91.86    | 5.14       | 2.99         | 43620          | 25205                  | 6.458        |



**Supplementary Figure 3 A.** Expression of the set of 521 HC-enriched transcripts (used in the analysis shown in Figure 6C) is significantly elevated in HCs also when compared to macrophages (Mph). To address a possible concern that the downregulation of the HC-enriched transcripts in *Gfi1*<sup>Cre/+</sup> cochlea could arise from changes in Mph gene expression, we further determined the relative expression levels of these 521 transcripts in two Mph datasets. For each gene that was expressed in both the HC dataset (based on intersection of Elkon et al., Cai et al.<sup>1,32</sup>) and the Mph datasets (obtained from Avraham et al., Langlais et al.<sup>33,34</sup>), HC to Mph fold-change of expression level was calculated. This resulted in a set of fold-change values for 7,219 and 9,078 genes expressed both in HCs and Mph. Of the 521 HC-enriched transcripts defined in Fig 6C, only 135 and 254 were expressed in the two Mph datasets, respectively. This analysis compares the distribution of fold-change values for these remaining HC-enriched transcripts vs. all other overlapping genes (*p*-values calculated using Wilcoxon's test.). Thus, the majority of the HC-enriched transcripts were not detected at all in Mph, and those that were detected (135 and 254) show significantly higher expression in HCs (*p*-values = 1.22E-20 and 2.71E-55 respectively). **B.** Based on the macrophage expression datasets, a set of 360 macrophage-enriched transcripts was defined. The expression of this set of genes is not decreased in the *Gfi1*<sup>Cre/+</sup> mice cochlea.

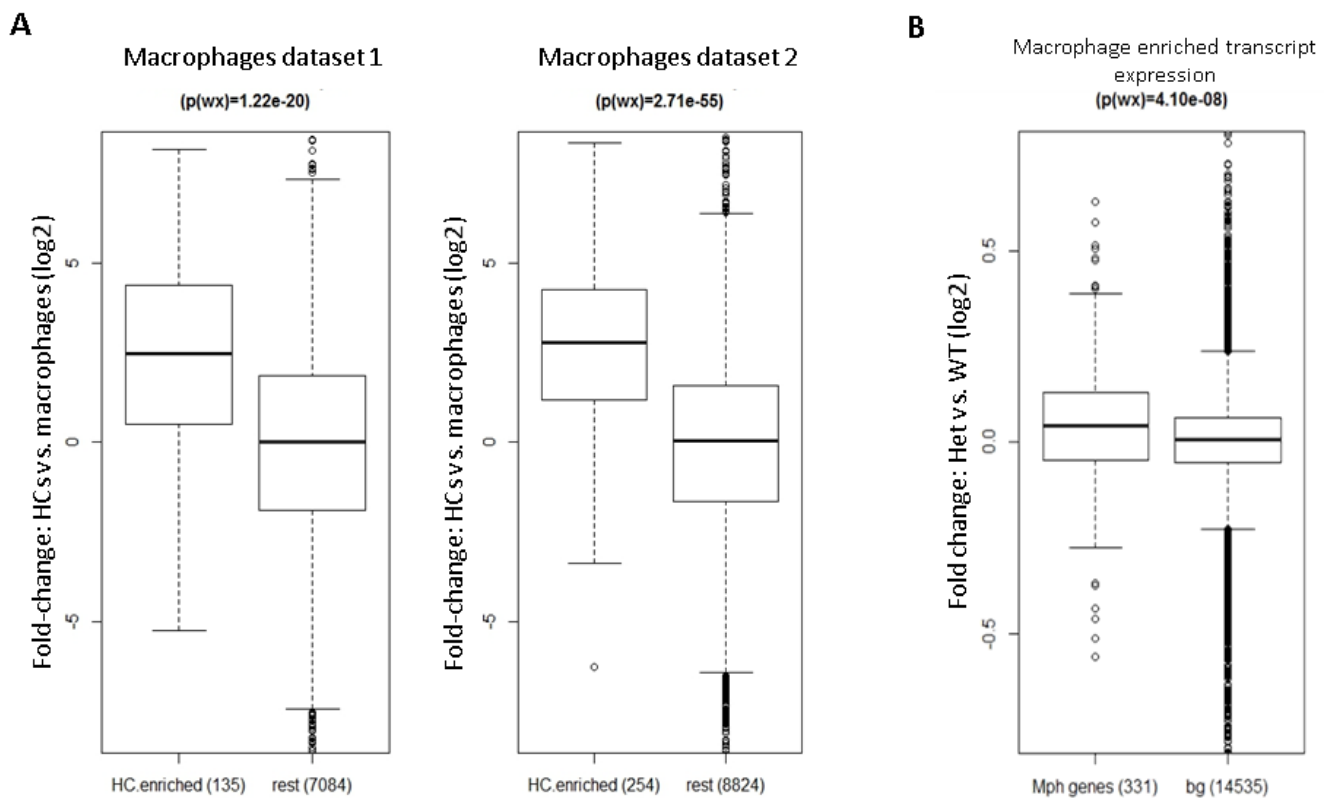

**Supplementary Table 3** List of genes encoding 360 transcripts enriched in macrophages according to both Avraham et al., 2016 and Langlais et al., 2016<sup>33,34</sup>.

| <b>Ensembl ID</b>  | <b>Gene symbol</b> |
|--------------------|--------------------|
| ENSMUSG00000069892 | 9930111J21Rik2     |
| ENSMUSG00000052760 | A630001G21Rik      |
| ENSMUSG00000023088 | Abcc1              |
| ENSMUSG00000020865 | Abcc3              |
| ENSMUSG00000044573 | Acp1               |
| ENSMUSG00000062825 | Actg1              |
| ENSMUSG00000025473 | Adam8              |
| ENSMUSG00000056413 | Adap1              |
| ENSMUSG00000039041 | Adrm1              |
| ENSMUSG00000011148 | Adssl1             |
| ENSMUSG00000027597 | Ahcy               |
| ENSMUSG00000062753 | AI413582           |
| ENSMUSG00000087107 | AI662270           |
| ENSMUSG00000024397 | Aif1               |
| ENSMUSG00000037860 | Aim2               |
| ENSMUSG00000024885 | Aldh3b1            |
| ENSMUSG00000060063 | Alox5ap            |
| ENSMUSG00000030649 | Anapc15            |
| ENSMUSG00000040701 | Ap1g2              |
| ENSMUSG00000022841 | Ap2m1              |
| ENSMUSG00000026786 | Apbb1ip            |
| ENSMUSG00000040613 | Apobec1            |
| ENSMUSG00000027255 | Arfgap2            |
| ENSMUSG00000048865 | Arhgap30           |
| ENSMUSG00000031389 | Arhgap4            |
| ENSMUSG00000030220 | Arhgdib            |
| ENSMUSG00000060216 | Arrb2              |
| ENSMUSG00000005470 | Asf1b              |
| ENSMUSG00000029752 | Asns               |
| ENSMUSG00000006057 | Atp5g1             |
| ENSMUSG00000038717 | Atp5l              |
| ENSMUSG00000033379 | Atp6v0b            |
| ENSMUSG00000022295 | Atp6v1c1           |
| ENSMUSG00000060131 | Atp8b4             |
| ENSMUSG00000054428 | Atpif1             |
| ENSMUSG00000060802 | B2m                |
| ENSMUSG00000059479 | B3gnt8             |
| ENSMUSG00000006731 | B4galnt1           |

|                     |         |
|---------------------|---------|
| ENSMUSG00000004446  | Bid     |
| ENSMUSG000000061132 | Blnk    |
| ENSMUSG00000001999  | Blvra   |
| ENSMUSG000000040466 | Blvrb   |
| ENSMUSG000000021660 | Btf3    |
| ENSMUSG000000036887 | C1qa    |
| ENSMUSG000000036905 | C1qb    |
| ENSMUSG000000036896 | C1qc    |
| ENSMUSG000000040552 | C3ar1   |
| ENSMUSG000000049130 | C5ar1   |
| ENSMUSG000000056737 | Capg    |
| ENSMUSG000000070372 | Capza1  |
| ENSMUSG000000029836 | Cbx3    |
| ENSMUSG000000047810 | Ccdc88b |
| ENSMUSG000000035385 | Ccl2    |
| ENSMUSG000000000982 | Ccl3    |
| ENSMUSG000000018930 | Ccl4    |
| ENSMUSG000000035373 | Ccl7    |
| ENSMUSG000000019122 | Ccl9    |
| ENSMUSG000000051439 | Cd14    |
| ENSMUSG000000021624 | Cd180   |
| ENSMUSG000000002944 | Cd36    |
| ENSMUSG000000030798 | Cd37    |
| ENSMUSG000000040747 | Cd53    |
| ENSMUSG000000025351 | Cd63    |
| ENSMUSG000000018774 | Cd68    |
| ENSMUSG000000024610 | Cd74    |
| ENSMUSG000000026437 | Cdk18   |
| ENSMUSG000000056501 | Cebpb   |
| ENSMUSG000000001128 | Cfp     |
| ENSMUSG000000090258 | Churc1  |
| ENSMUSG000000032436 | Cmtm7   |
| ENSMUSG000000030707 | Coro1a  |
| ENSMUSG000000028337 | Coro2a  |
| ENSMUSG000000091803 | Cox16   |
| ENSMUSG000000000088 | Cox5a   |
| ENSMUSG000000061518 | Cox5b   |
| ENSMUSG000000017778 | Cox7c   |
| ENSMUSG000000040713 | Cregl   |
| ENSMUSG000000006360 | Crip1   |
| ENSMUSG000000024621 | Csf1r   |

|                    |           |
|--------------------|-----------|
| ENSMUSG00000059326 | Csf2ra    |
| ENSMUSG00000071714 | Csf2rb2   |
| ENSMUSG00000005054 | Cstb      |
| ENSMUSG00000038642 | Ctss      |
| ENSMUSG00000016256 | Ctsz      |
| ENSMUSG00000052336 | Cx3cr1    |
| ENSMUSG00000018920 | Cxcl16    |
| ENSMUSG00000032872 | Cyb5r4    |
| ENSMUSG00000006519 | Cyba      |
| ENSMUSG00000015340 | Cybb      |
| ENSMUSG00000063694 | Cycs      |
| ENSMUSG00000018008 | Cyth4     |
| ENSMUSG00000026832 | Cytip     |
| ENSMUSG00000030347 | D6Wsu163e |
| ENSMUSG00000001666 | Ddt       |
| ENSMUSG00000001674 | Ddx18     |
| ENSMUSG00000013973 | Dedd      |
| ENSMUSG00000017830 | Dhx58     |
| ENSMUSG00000019088 | Dnase111  |
| ENSMUSG00000003812 | Dnase2a   |
| ENSMUSG00000020143 | Dock2     |
| ENSMUSG00000052085 | Dock8     |
| ENSMUSG00000068335 | Dok1      |
| ENSMUSG00000022102 | Dok2      |
| ENSMUSG00000035711 | Dok3      |
| ENSMUSG00000053687 | Dpep2     |
| ENSMUSG00000020057 | Dram1     |
| ENSMUSG00000071644 | Eef1g     |
| ENSMUSG00000040659 | Efhd2     |
| ENSMUSG00000035150 | Eif2s3x   |
| ENSMUSG00000059796 | Eif4a1    |
| ENSMUSG00000021728 | Emb       |
| ENSMUSG00000040212 | Emp3      |
| ENSMUSG00000021996 | Esd       |
| ENSMUSG00000027533 | Fabp5     |
| ENSMUSG00000056069 | Fam105a   |
| ENSMUSG00000083012 | Fam220a   |
| ENSMUSG00000038274 | Fau       |
| ENSMUSG00000046865 | Fbl       |
| ENSMUSG00000058715 | Fcer1g    |
| ENSMUSG00000059498 | Fcgr3     |

|                    |         |
|--------------------|---------|
| ENSMUSG00000059743 | Fdps    |
| ENSMUSG00000024742 | Fen1    |
| ENSMUSG00000024965 | Fermt3  |
| ENSMUSG00000037946 | Fgd3    |
| ENSMUSG00000055805 | Fmnl1   |
| ENSMUSG00000033386 | Frrs1   |
| ENSMUSG00000024661 | Fth1    |
| ENSMUSG00000050708 | Ftl1    |
| ENSMUSG00000009687 | Fxyd5   |
| ENSMUSG00000022148 | Fyb     |
| ENSMUSG00000057666 | Gapdh   |
| ENSMUSG00000058624 | Gda     |
| ENSMUSG00000031266 | Gla     |
| ENSMUSG00000021591 | Glrx    |
| ENSMUSG00000078862 | Gm14326 |
| ENSMUSG00000078866 | Gm14420 |
| ENSMUSG00000060791 | Gmfg    |
| ENSMUSG00000036246 | Gmip    |
| ENSMUSG00000006715 | Gmnn    |
| ENSMUSG00000027523 | Gnas    |
| ENSMUSG00000068523 | Gng5    |
| ENSMUSG00000052102 | Gnpda1  |
| ENSMUSG00000029816 | Gpnmb   |
| ENSMUSG00000021306 | Gpr137b |
| ENSMUSG00000025156 | Gps1    |
| ENSMUSG00000034786 | Gpsm3   |
| ENSMUSG00000063856 | Gpx1    |
| ENSMUSG00000037894 | H2afz   |
| ENSMUSG00000061232 | H2-K1   |
| ENSMUSG00000067212 | H2-T23  |
| ENSMUSG00000060743 | H3f3a   |
| ENSMUSG00000027944 | Hax1    |
| ENSMUSG00000003283 | Hck     |
| ENSMUSG00000022831 | Hcls1   |
| ENSMUSG00000028800 | Hdac1   |
| ENSMUSG00000021665 | Hexb    |
| ENSMUSG00000025877 | Hk3     |
| ENSMUSG00000003038 | Hmgn2   |
| ENSMUSG00000035697 | Hmha1   |
| ENSMUSG00000005413 | Hmox1   |
| ENSMUSG00000026986 | Hnmt    |

|                    |          |
|--------------------|----------|
| ENSMUSG00000029919 | Hpgds    |
| ENSMUSG00000015656 | Hspa8    |
| ENSMUSG00000027245 | Hypk     |
| ENSMUSG00000079017 | Ifi2712a |
| ENSMUSG00000035004 | Igsf6    |
| ENSMUSG00000042349 | Ikbke    |
| ENSMUSG00000018654 | Ikzf1    |
| ENSMUSG00000032089 | Il10ra   |
| ENSMUSG00000022969 | Il10rb   |
| ENSMUSG00000002897 | Il17ra   |
| ENSMUSG00000030745 | Il21r    |
| ENSMUSG00000031304 | Il2rg    |
| ENSMUSG00000027947 | Il6ra    |
| ENSMUSG00000003882 | Il7r     |
| ENSMUSG00000062867 | Impdh2   |
| ENSMUSG00000029771 | Irf5     |
| ENSMUSG00000041515 | Irf8     |
| ENSMUSG00000030830 | Itgal    |
| ENSMUSG00000030786 | Itgam    |
| ENSMUSG00000000290 | Itgb2    |
| ENSMUSG00000028931 | Kcnab2   |
| ENSMUSG00000054342 | Kcnn4    |
| ENSMUSG00000018362 | Kpna2    |
| ENSMUSG00000055541 | Lair1    |
| ENSMUSG00000091512 | Lamtor3  |
| ENSMUSG00000028581 | Laptm5   |
| ENSMUSG00000040751 | Lat2     |
| ENSMUSG00000002699 | Lcp2     |
| ENSMUSG00000063229 | Ldha     |
| ENSMUSG00000050335 | Lgals3   |
| ENSMUSG00000033880 | Lgals3bp |
| ENSMUSG00000024781 | Lipa     |
| ENSMUSG00000016239 | Lonrf3   |
| ENSMUSG00000015568 | Lpl      |
| ENSMUSG00000030263 | Lrmp     |
| ENSMUSG00000018819 | Lsp1     |
| ENSMUSG00000069516 | Lyz2     |
| ENSMUSG00000039208 | Metrn1   |
| ENSMUSG00000034854 | Mfsd12   |
| ENSMUSG00000033307 | Mif      |
| ENSMUSG00000012519 | Mkl1     |

|                    |         |
|--------------------|---------|
| ENSMUSG00000025355 | Mmp19   |
| ENSMUSG00000003348 | Mob3a   |
| ENSMUSG00000039616 | Mocos   |
| ENSMUSG00000062270 | Morf411 |
| ENSMUSG00000023861 | Mpc1    |
| ENSMUSG00000046805 | Mpeg1   |
| ENSMUSG00000039640 | Mrpl12  |
| ENSMUSG00000024436 | Mrps18b |
| ENSMUSG00000029918 | Mrps33  |
| ENSMUSG00000038880 | Mrps34  |
| ENSMUSG00000024677 | Ms4a6b  |
| ENSMUSG00000079419 | Ms4a6c  |
| ENSMUSG00000024672 | Ms4a7   |
| ENSMUSG00000025044 | Msr1    |
| ENSMUSG00000075705 | Msrb1   |
| ENSMUSG00000005667 | Mthfd2  |
| ENSMUSG00000024300 | Myo1f   |
| ENSMUSG00000020437 | Myo1g   |
| ENSMUSG00000061315 | Naca    |
| ENSMUSG00000002204 | Napsa   |
| ENSMUSG00000027698 | Nceh1   |
| ENSMUSG00000015950 | Ncf1    |
| ENSMUSG00000026480 | Ncf2    |
| ENSMUSG00000022488 | Nckap11 |
| ENSMUSG00000056234 | Ncoa4   |
| ENSMUSG00000020022 | Ndufa12 |
| ENSMUSG00000005510 | Ndufs3  |
| ENSMUSG00000047180 | Neurl3  |
| ENSMUSG00000058099 | Nfam1   |
| ENSMUSG00000032691 | Nlrp3   |
| ENSMUSG00000037601 | Nme1    |
| ENSMUSG00000056209 | Npm3    |
| ENSMUSG00000002108 | Nr1h3   |
| ENSMUSG00000026999 | Nup35   |
| ENSMUSG00000052776 | Oas1a   |
| ENSMUSG00000048779 | P2ry6   |
| ENSMUSG00000023249 | Parp3   |
| ENSMUSG00000022439 | Parvg   |
| ENSMUSG00000021496 | Pcbd2   |
| ENSMUSG00000027342 | Pcna    |
| ENSMUSG00000020553 | Pctp    |

|                    |         |
|--------------------|---------|
| ENSMUSG00000011752 | Pgam1   |
| ENSMUSG00000062070 | Pgk1    |
| ENSMUSG00000038845 | Phb     |
| ENSMUSG00000025017 | Pik3ap1 |
| ENSMUSG00000039936 | Pik3cd  |
| ENSMUSG00000020901 | Pik3r5  |
| ENSMUSG00000021822 | Plau    |
| ENSMUSG00000046223 | Plaur   |
| ENSMUSG00000040061 | Plcb2   |
| ENSMUSG00000034330 | Plcg2   |
| ENSMUSG00000052160 | Pld4    |
| ENSMUSG00000020120 | Plek    |
| ENSMUSG00000031557 | Plekha2 |
| ENSMUSG00000026123 | Plekha2 |
| ENSMUSG00000028494 | Plin2   |
| ENSMUSG00000031146 | Plp2    |
| ENSMUSG00000021871 | Pnp     |
| ENSMUSG00000071866 | Ppia    |
| ENSMUSG00000004455 | Ppp1cc  |
| ENSMUSG00000045679 | Pqlc3   |
| ENSMUSG00000028691 | Prdx1   |
| ENSMUSG00000067713 | Prkag1  |
| ENSMUSG00000026979 | Psd4    |
| ENSMUSG00000036835 | Psenen  |
| ENSMUSG00000060073 | Psma3   |
| ENSMUSG00000068749 | Psma5   |
| ENSMUSG00000069744 | Psemb3  |
| ENSMUSG00000022193 | Psemb5  |
| ENSMUSG00000024338 | Psemb8  |
| ENSMUSG00000079197 | Psmc2   |
| ENSMUSG00000025429 | Pstpip2 |
| ENSMUSG00000056529 | Ptafr   |
| ENSMUSG00000043017 | Ptgir   |
| ENSMUSG00000004266 | Ptpn6   |
| ENSMUSG00000031506 | Ptpn7   |
| ENSMUSG00000026395 | Ptprc   |
| ENSMUSG00000030793 | Pycard  |
| ENSMUSG00000019832 | Rab32   |
| ENSMUSG00000033220 | Rac2    |
| ENSMUSG00000004952 | Rasa4   |
| ENSMUSG00000026430 | Rassf5  |



|                    |           |
|--------------------|-----------|
| ENSMUSG00000031167 | Rbm3      |
| ENSMUSG00000031387 | Renbp     |
| ENSMUSG00000026358 | Rgs1      |
| ENSMUSG00000030844 | Rgs10     |
| ENSMUSG00000031438 | Rnf128    |
| ENSMUSG00000030079 | Ruvbl1    |
| ENSMUSG00000019782 | Rwdd1     |
| ENSMUSG00000001020 | S100a4    |
| ENSMUSG00000001025 | S100a6    |
| ENSMUSG00000022876 | Samsn1    |
| ENSMUSG00000031101 | Sash3     |
| ENSMUSG00000078974 | Sec61g    |
| ENSMUSG00000028064 | Sema4a    |
| ENSMUSG00000074884 | Serf2     |
| ENSMUSG00000060147 | Serpinb6a |
| ENSMUSG00000068856 | Sf3b4     |
| ENSMUSG00000028843 | Sh3bgrl3  |
| ENSMUSG00000054520 | Sh3bp2    |
| ENSMUSG00000059182 | Skap2     |
| ENSMUSG00000022372 | Sla       |
| ENSMUSG00000024737 | Slc15a3   |
| ENSMUSG00000025161 | Slc16a3   |
| ENSMUSG00000029175 | Slc35f6   |
| ENSMUSG00000032122 | Slc37a2   |
| ENSMUSG00000024327 | Slc39a7   |
| ENSMUSG00000034591 | Slc41a2   |
| ENSMUSG00000072620 | Slfn2     |
| ENSMUSG00000024217 | Snrpc     |
| ENSMUSG00000031662 | Snx20     |
| ENSMUSG00000029560 | Snx8      |
| ENSMUSG00000026222 | Sp100     |
| ENSMUSG00000070034 | Sp110     |
| ENSMUSG00000051457 | Spn       |
| ENSMUSG00000029304 | Spp1      |
| ENSMUSG00000024160 | Spsb3     |
| ENSMUSG00000034120 | Srsf2     |
| ENSMUSG00000032802 | Srxn1     |
| ENSMUSG00000028832 | Stmn1     |
| ENSMUSG00000020738 | Sumo2     |
| ENSMUSG00000021384 | Susd3     |
| ENSMUSG00000089847 | Timm10b   |

|                    |          |
|--------------------|----------|
| ENSMUSG00000013701 | Timm23   |
| ENSMUSG00000033777 | Tlr13    |
| ENSMUSG00000091537 | Tma7     |
| ENSMUSG00000029390 | Tmed2    |
| ENSMUSG00000034947 | Tmem106a |
| ENSMUSG00000038141 | Tmem181a |
| ENSMUSG00000025521 | Tmem192  |
| ENSMUSG00000060538 | Tmem219  |
| ENSMUSG00000024401 | Tnf      |
| ENSMUSG00000028599 | Tnfrsf1b |
| ENSMUSG00000045362 | Tnfrsf26 |
| ENSMUSG00000060126 | Tpt1     |
| ENSMUSG00000037318 | Traf3ip3 |
| ENSMUSG00000023992 | Trem2    |
| ENSMUSG00000018507 | Trpv2    |
| ENSMUSG00000041736 | Tspo     |
| ENSMUSG00000036918 | Ttc7     |
| ENSMUSG00000043091 | Tuba1c   |
| ENSMUSG00000073838 | Tufm     |
| ENSMUSG00000057130 | Txn14a   |
| ENSMUSG00000030579 | Tyrobp   |
| ENSMUSG00000061613 | U2af1    |
| ENSMUSG00000026956 | Uap111   |
| ENSMUSG00000090137 | Uba52    |
| ENSMUSG00000027078 | Ube2l6   |
| ENSMUSG00000060860 | Ube2s    |
| ENSMUSG00000057948 | Unc13d   |
| ENSMUSG00000036908 | Unc93b1  |
| ENSMUSG00000020163 | Uqcr11   |
| ENSMUSG00000034116 | Vav1     |
| ENSMUSG00000028452 | Vcp      |
| ENSMUSG00000064090 | Vrk2     |
| ENSMUSG00000051506 | Wdfy4    |
| ENSMUSG00000058486 | Wdr91    |
| ENSMUSG00000024066 | Xdh      |

**Supplementary Table 4** Gene-Ontology (GO) functional enrichment analysis demonstrating that the defined set of 360 macrophage enriched transcripts are significantly enriched for immune-system related functions.

| <b>Term</b>                                             | <b>Count</b> | <b>P-Value</b> | <b>Fold Enrichment</b> | <b>FDR</b> |
|---------------------------------------------------------|--------------|----------------|------------------------|------------|
| GO:0006955: immune response                             | 39           | 1.12E-13       | 4.18                   | 1.88E-10   |
| GO:0006954: inflammatory response                       | 22           | 3.66E-09       | 4.94                   | 6.15E-06   |
| GO:0009611: response to wounding                        | 26           | 2.34E-08       | 3.78                   | 3.94E-05   |
| GO:0006935: chemotaxis                                  | 19           | 3.86E-12       | 8.81                   | 6.50E-09   |
| GO:0048584: positive regulation of response to stimulus | 17           | 8.45E-07       | 4.62                   | 0.00142109 |
| GO:0002709: regulation of T cell mediated immunity      | 7            | 8.47E-07       | 19.64                  | 0.00142439 |
| GO:0002703: regulation of leukocyte mediated immunity   | 11           | 1.05E-06       | 7.94                   | 0.00177359 |
| GO:0002819: regulation of adaptive immune response      | 10           | 1.33E-06       | 9.02                   | 0.00223765 |
| GO:0002706: regulation of lymphocyte mediated immunity  | 10           | 4.81E-06       | 7.77                   | 0.00808705 |
